# Supplementary material for: Major genetic discontinuity and novel toxigenic species in Clostridioides difficile taxonomy
Source: eLife. 2021 Jun 11;10:e64325. doi: 10.7554/eLife.64325 (PMC8241443; doi:10.7554/eLife.64325)
Supplement: Supplementary file 2. [file elife-64325-supp2.nwk]

((((((((((((((((((((134:0.00023223,60:0.00033918)0.5320:0.00016736,59:0.00069025)0.2200:0.00011661,(381:0.00027737,244:0.00000827)0.3920:0.00016916)0.1540:0.00017533,(430:0.00049888,(558:0.00005032,(321:0.00058646,(103:0.00000771,479:0.00027796)0.7520:0.00027104)0.3700:0.00023533)0.1700:0.00007277)0.1960:0.00017366)0.1540:0.00014577,(233:0.00025750,((100:0.00075459,581:0.00010268)0.4760:0.00019302,(358:0.00001088,((184:0.00001849,636:0.00026717)0.7380:0.00043977,(143:0.00001264,457:0.00055882)0.2620:0.00013208)0.1740:0.00013187)0.1040:0.00009327)0.0640:0.00017140)0.0160:0.00001957)0.0060:0.00008479,(29:0.00002377,(544:0.00052352,545:0.00004794)0.4460:0.00026198)0.0900:0.00012522)0.0040:0.00018001,(363:0.00047774,(352:0.00000060,378:0.00028506)0.5940:0.00037970)0.1040:0.00006597)0.0020:0.00022838,(((((522:0.00009778,129:0.00018786)0.1680:0.00008493,126:0.00020079)0.2200:0.00010436,257:0.00046726)0.0380:0.00009711,(79:0.00028014,397:0.00000552)0.0900:0.00011726)0.0060:0.00015946,((((235:0.00027073,291:0.00001491)0.3000:0.00020288,(318:0.00022833,349:0.00005733)0.2840:0.00008305)0.1060:0.00011491,(65:0.00025755,288:0.00002809)0.4680:0.00045691)0.0100:0.00004705,(((409:0.00039434,104:0.00017724)0.3840:0.00019087,199:0.00038085)0.0720:0.00005017,(((236:0.00047611,624:0.00038121)0.1920:0.00016265,653:0.00012308)0.0760:0.00021352,((445:0.00107976,141:0.00034967)0.2640:0.00024691,(294:0.00111792,(239:0.00000045,292:0.00028519)0.5280:0.00002619)0.3160:0.00025444)0.0640:0.00007236)0.0220:0.00014656)0.0220:0.00014089)0.0000:0.00042289)0.0000:0.00005969)0.0000:0.00001142,(((((((74:0.00028601,80:0.00000000)0.6740:0.00022735,152:0.00005837)0.2940:0.00021868,(75:0.00075067,205:0.00096624)0.2040:0.00021014)0.0000:0.00001643,312:0.00034077)0.0160:0.00024880,(538:0.00004438,(648:0.00028514,101:0.00000051)0.8340:0.00052749)0.2400:0.00025190)0.0000:0.00001743,(601:0.00028372,(118:0.00057119,(460:0.00028567,(3:0.00000000,(422:0.00028573,(293:0.00028569,(84:0.00028569,271:0.00028569)0.0260:0.00000000)0.0180:0.00000000)0.0140:0.00000003)0.0060:0.00000003)0.0080:0.00000028)0.0000:0.00000174)0.0000:0.00001676)0.0000:0.00005763,(((203:0.00028396,501:0.00000170)0.5440:0.00010131,245:0.00047023)0.3200:0.00016286,(((((436:0.00028543,329:0.00028611)0.5440:0.00000048,125:0.00000000)0.8340:0.00050337,78:0.00006819)0.2480:0.00011597,(639:0.00011113,(107:0.00002374,40:0.00026192)0.4420:0.00017457)0.3100:0.00017002)0.1540:0.00020911,(((268:0.00028611,76:0.00000000)0.1060:0.00000075,302:0.00028501)0.0560:0.00002066,((191:0.00054851,225:0.00030924)0.2840:0.00025272,(482:0.00000657,(301:0.00056840,427:0.00000318)0.4380:0.00027921)0.3120:0.00003359)0.2220:0.00026538)0.0040:0.00006813)0.0000:0.00005604)0.0000:0.00007218)0.0000:0.00004212)0.0000:0.00002018,((((((420:0.00028569,599:0.00028569)0.6180:0.00000025,42:0.00000000)0.2580:0.00000866,412:0.00056281)0.0840:0.00004240,542:0.00024335)0.0640:0.00026132,237:0.00002441)0.0080:0.00017939,(((106:0.00035803,535:0.00049929)0.5760:0.00049886,575:0.00064565)0.0440:0.00035325,((((((((313:0.00027971,328:0.00029175)0.6180:0.00037302,308:0.00048477)0.4280:0.00023509,(144:0.00028422,(17:0.00000000,400:0.00028597)0.0660:0.00000148)0.0700:0.00005074)0.0100:0.00009424,(92:0.00006211,(112:0.00025886,(172:0.00114096,286:0.00000247)0.0960:0.00002700)0.0780:0.00022362)0.0080:0.00012036)0.0000:0.00005474,(4:0.00024721,((379:0.00137574,326:0.00005389)0.2320:0.00026065,(53:0.00000000,73:0.00028598)0.2340:0.00002581)0.0680:0.00003862)0.1180:0.00019567)0.0000:0.00006094,(7:0.00020852,((117:0.00000325,348:0.00028239)0.3260:0.00026271,(489:0.00011842,33:0.00016731)0.5160:0.00030903)0.0560:0.00022023)0.0000:0.00004168)0.0000:0.00004717,(626:0.00084110,(119:0.00028006,(561:0.00028558,48:0.00000009)0.0220:0.00000566)0.0120:0.00001662)0.0000:0.00002673)0.0000:0.00006947,(((383:0.00027543,583:0.00001023)0.4300:0.00038333,248:0.00018821)0.0840:0.00016011,((((((((404:0.00028562,155:0.00028579)0.3220:0.00000042,185:0.00000000)0.5100:0.00009993,182:0.00018579)0.4340:0.00020783,282:0.00007786)0.3200:0.00024371,256:0.00004206)0.0920:0.00015646,(553:0.00026054,(13:0.00000000,(50:0.00028563,(608:0.00028559,(605:0.00028597,304:0.00028561)0.1220:0.00000010)0.0860:0.00000006)0.0760:0.00000025)0.2480:0.00002515)0.1440:0.00005811)0.0520:0.00019305,(150:0.00001128,(57:0.00028534,(597:0.00028597,12:0.00000000)0.4600:0.00000038)0.4620:0.00027445)0.0820:0.00012872)0.0000:0.00015567,((((((((406:0.00028438,15:0.00000127)0.1320:0.00000401,108:0.00028180)0.0880:0.00001234,398:0.00027337)0.0620:0.00006248,272:0.00022324)0.0620:0.00010622,(452:0.00027178,(618:0.00028593,9:0.00000000)0.6020:0.00001391)0.4640:0.00017967)0.0120:0.00011624,(234:0.00001901,(70:0.00028599,56:0.00000000)0.5580:0.00026671)0.1760:0.00024112)0.0060:0.00002366,(578:0.00000400,(71:0.00028600,45:0.00000000)0.3880:0.00028173)0.0020:0.00001205)0.0000:0.00000608,(((540:0.00057196,90:0.00000000)0.4920:0.00025417,(537:0.00056901,421:0.00000245)0.3040:0.00003183)0.2720:0.00019339,((((145:0.00028045,46:0.00000521)0.3660:0.00027466,189:0.00001107)0.2520:0.00002893,94:0.00025680)0.3420:0.00017613,(77:0.00025737,(647:0.00080014,(72:0.00028419,(6:0.00000000,(89:0.00000000,(616:0.00028577,113:0.00028565)0.1860:0.00000009)0.1260:0.00000021)0.1620:0.00000152)0.1500:0.00005734)0.0160:0.00002839)0.0060:0.00010985)0.0000:0.00002115)0.0000:0.00008103)0.0000:0.00003549)0.0000:0.00016954)0.0000:0.00006796)0.0000:0.00003824)0.0000:0.00004312)0.0000:0.00008374)0.0000:0.00004128,(((((((((376:0.00026161,26:0.00002411)0.1060:0.00001405,299:0.00027171)0.0960:0.00006745,657:0.00021828)0.0700:0.00015335,(659:0.00025583,515:0.00002981)0.2580:0.00013244)0.0320:0.00012084,27:0.00016489)0.0240:0.00007328,631:0.00021258)0.0000:0.00008494,(83:0.00000249,64:0.00056892)0.0140:0.00005814)0.0000:0.00004800,(450:0.00012691,(255:0.00052143,296:0.00004999)0.2260:0.00015888)0.1520:0.00022902)0.0000:0.00013043,(((151:0.00000106,480:0.00028460)0.1880:0.00010633,82:0.00017940)0.0880:0.00016036,(111:0.00008427,(((((105:0.00082433,21:0.00003300)0.2120:0.00018333,582:0.00010251)0.2220:0.00016713,139:0.00011855)0.1020:0.00021096,354:0.00007480)0.0020:0.00003731,((586:0.00028520,19:0.00000046)0.7400:0.00047555,(468:0.00000078,(24:0.00028636,20:0.00000000)0.8160:0.00028498)0.4620:0.00009626)0.1800:0.00021294)0.0000:0.00004062)0.0000:0.00002724)0.0000:0.00013163)0.0000:0.00005814)0.0000:0.00001227,((((((504:0.00001077,454:0.00027489)0.4040:0.00014647,319:0.00013923)0.1360:0.00018771,506:0.00024110)0.1160:0.00009810,18:0.00004470)0.0360:0.00003724,(490:0.00026960,621:0.00001606)0.1620:0.00024861)0.0060:0.00005962,(((523:0.00084955,546:0.00058037)0.0260:0.00001337,(250:0.00000709,153:0.00027855)0.3020:0.00027238)0.0300:0.00012649,(((((((((((497:0.00028573,309:0.00028573)0.1820:0.00000000,629:0.00028573)0.1420:0.00000000,611:0.00028573)0.1160:0.00000031,333:0.00028542)0.0300:0.00000018,8:0.00000000)0.0400:0.00000043,305:0.00028527)0.0420:0.00000272,183:0.00028297)0.0420:0.00000909,146:0.00027675)0.0400:0.00006944,((263:0.00056703,66:0.00000439)0.2100:0.00019705,(566:0.00028615,91:0.00000000)0.6020:0.00037471)0.0520:0.00007357)0.0320:0.00012265,(16:0.00008079,(579:0.00018466,(246:0.00003099,160:0.00025466)0.1340:0.00010115)0.1020:0.00020495)0.0040:0.00002044)0.0160:0.00006523,((((31:0.00025837,580:0.00002728)0.2560:0.00013259,654:0.00043893)0.0620:0.00011076,532:0.00003203)0.0480:0.00013255,(((470:0.00028433,98:0.00000133)0.3220:0.00016570,(519:0.00018905,322:0.00009659)0.1160:0.00012023)0.0700:0.00014527,(((((99:0.00026665,55:0.00001901)0.1780:0.00002378,278:0.00026192)0.2540:0.00016981,512:0.00011588)0.3020:0.00017590,564:0.00010982)0.0240:0.00007361,(52:0.00007671,((213:0.00046639,51:0.00039094)0.3920:0.00042664,(555:0.00048373,(115:0.00023532,149:0.00005034)0.2440:0.00008786)0.0800:0.00014559)0.0200:0.00006587)0.0000:0.00001135)0.0040:0.00008940)0.0020:0.00005071)0.0080:0.00010910)0.0200:0.00024708)0.0000:0.00003262)0.0000:0.00019138)0.0000:0.00005786,((((((((((((((54:0.00000046,472:0.00028518)0.1440:0.00000026,85:0.00028543)0.2080:0.00000211,484:0.00028358)0.2340:0.00001037,220:0.00084743)0.1240:0.00003968,467:0.00024626)0.1640:0.00022722,(212:0.00054959,520:0.00030773)0.2440:0.00005887)0.0880:0.00012525,399:0.00044640)0.0540:0.00016725,(630:0.00054646,(408:0.00023490,68:0.00005077)0.5680:0.00031126)0.2060:0.00015477)0.0500:0.00016776,469:0.00074393)0.0180:0.00008742,625:0.00091385)0.0100:0.00005164,505:0.00023401)0.0040:0.00022321,563:0.00027702)0.0000:0.00002097,(242:0.00056997,(267:0.00057090,(645:0.00028582,28:0.00000000)0.0260:0.00000057)0.0040:0.00000159)0.0020:0.00001458)0.0000:0.00003447,((((443:0.00028546,570:0.00028607)0.3680:0.00000048,190:0.00000000)0.8760:0.00071896,(640:0.00026365,137:0.00002201)0.1040:0.00013936)0.0020:0.00011299,((((((((211:0.00063416,287:0.00022322)0.4340:0.00014008,210:0.00014573)0.5020:0.00028592,(122:0.00004816,377:0.00023751)0.8500:0.00085870)0.0580:0.00005653,414:0.00080168)0.0300:0.00004776,(284:0.00005267,478:0.00051890)0.4960:0.00034560)0.1600:0.00017803,429:0.00059056)0.0840:0.00014288,(591:0.00463697,(423:0.00026080,(424:0.00052453,(274:0.00028496,(513:0.00020020,(517:0.00027705,516:0.00000861)0.4820:0.00008549)0.6760:0.00028665)0.3480:0.00004737)0.4360:0.00031100)0.1600:0.00016978)0.1340:0.00004165)0.1740:0.00071084,(604:0.00016312,((((135:0.00028193,456:0.00000380)0.6080:0.00041669,(240:0.00066477,131:0.00047835)0.1940:0.00015539)0.1040:0.00014325,425:0.00100179)0.0140:0.00042706,((((((334:0.00028615,102:0.00000000)0.2700:0.00000411,483:0.00028174)0.0920:0.00000605,249:0.00027969)0.0980:0.00009585,355:0.00047580)0.0200:0.00009888,((499:0.00028629,14:0.00000000)0.5240:0.00021474,(426:0.00082031,49:0.00003701)0.0520:0.00007152)0.0600:0.00018730)0.0000:0.00003057,((((656:0.00028472,494:0.00000095)0.3040:0.00023667,529:0.00004905)0.1400:0.00008188,(539:0.00048330,370:0.00008812)0.3440:0.00020404)0.0180:0.00005911,(289:0.00026542,(514:0.00027760,(451:0.00028175,(214:0.00028096,(617:0.00028506,(453:0.00028556,(2:0.00000000,(507:0.00028560,(419:0.00028566,(110:0.00028564,(655:0.00028570,(622:0.00028567,(295:0.00028562,(615:0.00028585,265:0.00028585)0.0880:0.00000011)0.0200:0.00000005)0.0060:0.00000003)0.0060:0.00000005)0.0040:0.00000002)0.0140:0.00000008)0.0160:0.00000019)0.0000:0.00000016)0.0020:0.00000063)0.0020:0.00000476)0.0020:0.00000394)0.0040:0.00000809)0.0120:0.00002027)0.0020:0.00008386)0.0000:0.00002310)0.0000:0.00021749)0.0000:0.00007307)0.0000:0.00008223)0.0000:0.00002451)0.0000:0.00003861)0.0000:0.00001413)0.0000:0.00003813,(((((281:0.00000798,646:0.00056355)0.4400:0.00031044,175:0.00054724)0.1320:0.00003628,577:0.00053528)0.1360:0.00012275,(380:0.00088260,(356:0.00127410,132:0.00072787)0.5500:0.00083542)0.2540:0.00034252)0.0300:0.00012965,((((((((136:0.00047470,138:0.00009672)0.2940:0.00017741,251:0.00010832)0.0420:0.00005858,36:0.00008427)0.1020:0.00016739,325:0.00011847)0.0920:0.00014815,552:0.00013759)0.0000:0.00004320,(502:0.00011315,571:0.00045839)0.1580:0.00017142)0.0000:0.00003102,10:0.00007609)0.0000:0.00018446,(((((((585:0.00126732,324:0.00016220)0.4600:0.00028762,533:0.00057068)0.3040:0.00029725,171:0.00084743)0.1340:0.00017928,466:0.00024967)0.0860:0.00029229,165:0.00110296)0.0260:0.00016176,323:0.00012340)0.0080:0.00011770,((((((35:0.00000105,367:0.00028461)0.5000:0.00027873,247:0.00000700)0.3120:0.00017453,(208:0.00073658,43:0.00040694)0.4220:0.00054108)0.0900:0.00036872,218:0.00027482)0.0060:0.00007392,(306:0.00028593,44:0.00000000)0.2080:0.00006903)0.0040:0.00021385,(373:0.00079228,(357:0.00025424,(((270:0.00028580,374:0.00028561)0.8700:0.00000041,58:0.00000000)0.8240:0.00056807,(34:0.00000000,(488:0.00028558,432:0.00028596)0.1160:0.00000025)0.2580:0.00000363)0.0880:0.00003148)0.0840:0.00006590)0.0580:0.00017082)0.0000:0.00010015)0.0020:0.00014185)0.0000:0.00006228)0.0000:0.00000961)0.0000:0.00012439,(531:0.00010758,((307:0.00057159,69:0.00000000)0.1100:0.00012218,(596:0.00018555,(63:0.00026034,133:0.00002539)0.1080:0.00010021)0.0740:0.00016381)0.0020:0.00003518)0.0080:0.00002232)0.0120:0.00056828,(330:0.00059230,((384:0.00114301,385:0.00028641)0.2560:0.00018863,(((((((550:0.00004592,433:0.00023974)0.3380:0.00012864,277:0.00015709)0.2660:0.00010056,463:0.00047095)0.0880:0.00015528,(114:0.00000000,176:0.00028647)0.7320:0.00048848)0.1980:0.00021777,276:0.00024664)0.1680:0.00013138,554:0.00090543)0.1980:0.00049121,(((((228:0.00002380,651:0.00026186)0.5960:0.00014199,229:0.00014370)0.5580:0.00042160,364:0.00029299)0.2600:0.00016075,(549:0.00029144,362:0.00028014)0.4040:0.00030415)0.2140:0.00016241,((((633:0.00028098,227:0.00000474)0.2060:0.00000676,222:0.00027900)0.2520:0.00010071,120:0.00047093)0.1560:0.00021937,(623:0.00029628,((((((((((47:0.00000000,565:0.00028636)0.6800:0.00004228,372:0.00052929)0.3560:0.00013593,95:0.00014979)0.2900:0.00036430,61:0.00020775)0.0380:0.00009876,192:0.00004411)0.0180:0.00003319,606:0.00082485)0.0040:0.00002968,(567:0.00054931,(444:0.00006262,642:0.00050880)0.6120:0.00030820)0.1160:0.00010893)0.0000:0.00016272,(((351:0.00025154,396:0.00003412)0.4460:0.00021615,194:0.00006958)0.2180:0.00022826,((638:0.00052267,394:0.00004874)0.3140:0.00019852,((446:0.00057205,461:0.00000000)0.3540:0.00000286,(464:0.00028566,252:0.00000000)0.5080:0.00028299)0.2740:0.00023072)0.0740:0.00027218)0.0040:0.00010005)0.0000:0.00010684,(428:0.00018978,(541:0.00027806,97:0.00000767)0.6040:0.00038187)0.0160:0.00004239)0.0000:0.00009687,((((((156:0.00028472,573:0.00000093)0.5140:0.00028619,123:0.00028538)0.1680:0.00000027,128:0.00085733)0.0920:0.00000035,154:0.00000000)0.1660:0.00000301,32:0.00028274)0.0380:0.00017362,((((((366:0.00057166,67:0.00000000)0.0840:0.00000284,116:0.00028295)0.0800:0.00002402,(232:0.00012422,(574:0.00003841,576:0.00024726)0.4880:0.00016160)0.1640:0.00011894)0.0940:0.00013006,(223:0.00031231,(269:0.00028635,481:0.00000000)0.4880:0.00025936)0.1960:0.00015594)0.0400:0.00017538,(230:0.00030670,(62:0.00003462,(353:0.00006909,(197:0.00020964,(371:0.00024548,(1:0.00000000,(418:0.00028537,417:0.00028621)0.3980:0.00000098)0.3340:0.00004027)0.2900:0.00007620)0.4680:0.00021676)0.4060:0.00025117)0.2460:0.00026497)0.0060:0.00003595)0.0020:0.00024770,(612:0.00026686,(543:0.00026264,(157:0.00007632,((((196:0.00028365,365:0.00000199)0.3460:0.00009881,226:0.00018691)0.2000:0.00019080,462:0.00009493)0.0180:0.00002261,(140:0.00023144,(((188:0.00018763,231:0.00009810)0.2880:0.00019178,395:0.00009395)0.0760:0.00007523,(431:0.00027654,(652:0.00027865,(562:0.00056890,(224:0.00028484,((130:0.00028267,253:0.00000300)0.5240:0.00028483,(584:0.00028524,(264:0.00028662,41:0.00000000)0.0880:0.00000052)0.0360:0.00000098)0.0080:0.00000085)0.0080:0.00000263)0.0060:0.00000703)0.0060:0.00000915)0.0120:0.00006777)0.0160:0.00005429)0.0220:0.00015628)0.0000:0.00004857)0.0040:0.00016611)0.0040:0.00001883)0.0000:0.00003366)0.0000:0.00014741)0.0000:0.00006366)0.0020:0.00005827)0.0020:0.00002549)0.0020:0.00000864)0.0060:0.00009160)0.1220:0.00025203)0.0140:0.00004304)0.0820:0.00030407)0.0860:0.00028350,((((((((((((((((((((((258:0.00086162,415:0.00028190)0.1920:0.00000352,161:0.00028215)0.1080:0.00000179,317:0.00028394)0.0940:0.00000090,498:0.00028483)0.0780:0.00000045,607:0.00028528)0.0880:0.00000081,207:0.00028488)0.0860:0.00000372,11:0.00000000)0.6100:0.00028389,148:0.00028759)0.4380:0.00014778,186:0.00013811)0.3740:0.00021226,(173:0.00028950,392:0.00000000)0.5480:0.00007367)0.3800:0.00038730,166:0.00075654)0.0440:0.00004263,(316:0.00008367,(174:0.00014540,(163:0.00028785,391:0.00000000)0.7400:0.00014032)0.6460:0.00048784)0.4480:0.00045801)0.0200:0.00007129,386:0.00100108)0.0240:0.00022113,((387:0.00000372,169:0.00028193)0.4960:0.00014827,(280:0.00028818,315:0.00000000)0.1160:0.00013765)0.0960:0.00011409)0.0240:0.00004731,167:0.00013323)0.0500:0.00016107,164:0.00074575)0.3980:0.00094400,(168:0.00033306,(147:0.00054383,500:0.00002759)0.4620:0.00081086)0.2160:0.00031667)0.4020:0.00014685,195:0.00291709)0.8940:0.00168431,275:0.00161764)0.8920:0.00303103,(187:0.00163195,(393:0.00013906,(193:0.00028569,388:0.00000000)0.6520:0.00014676)0.7480:0.00037102)0.8420:0.00150666)1.0000:0.00538775,493:0.00109545)0.8660:0.00248628,((((((((((((((((96:0.00028518,25:0.00028639)0.2180:0.00000045,285:0.00028524)0.1360:0.00000022,413:0.00028547)0.1280:0.00000064,162:0.00028521)0.0400:0.00000042,221:0.00028527)0.0180:0.00000056,5:0.00000000)0.3580:0.00002930,389:0.00082849)0.2220:0.00026883,201:0.00001715)0.1380:0.00026077,528:0.00002508)0.1180:0.00030865,22:0.00040602)0.0840:0.00011610,(390:0.00028668,455:0.00000000)0.6440:0.00045367)0.1020:0.00015724,(518:0.00027810,590:0.00000756)0.9640:0.00070205)0.1100:0.00023180,(209:0.00028380,411:0.00000192)0.8840:0.00085981)0.1240:0.00021073,(587:0.00009967,(568:0.00009307,588:0.00019265)0.6400:0.00018618)0.7460:0.00066128)0.1840:0.00059504,589:0.00061449)0.2480:0.00033843,((((((216:0.00053872,217:0.00003269)0.4220:0.00002491,477:0.00026088)0.7820:0.00103504,410:0.00010904)0.2660:0.00038311,524:0.00090410)0.2680:0.00032698,((219:0.00105277,382:0.00009083)0.2620:0.00036916,(435:0.00010602,(350:0.00028749,81:0.00000000)0.8880:0.00075179)0.3960:0.00049055)0.0400:0.00089233)0.0260:0.00064616,(551:0.00251407,(((593:0.00029279,594:0.00027863)0.7440:0.00064609,198:0.00078438)0.4260:0.00030990,(511:0.00157343,((((((((((((569:0.00028651,441:0.00028491)0.1880:0.00000087,243:0.00000000)0.2140:0.00000693,(619:0.00055523,310:0.00030251)0.4560:0.00027892)0.1080:0.00006862,(298:0.00009433,(635:0.00018871,475:0.00009693)0.4200:0.00019139)0.0400:0.00007436)0.0520:0.00008608,(525:0.00030128,609:0.00055610)0.5420:0.00027180)0.0540:0.00004045,598:0.00031661)0.0260:0.00014935,(465:0.00028716,124:0.00000000)0.3520:0.00008297)0.0360:0.00015484,530:0.00046179)0.0300:0.00011522,(503:0.00028756,557:0.00000000)0.4900:0.00017067)0.0020:0.00005882,471:0.00051283)0.0040:0.00007047,((476:0.00056334,403:0.00029422)0.0780:0.00010000,((260:0.00065998,320:0.00019752)0.1060:0.00012032,((300:0.00030395,23:0.00112538)0.1720:0.00016171,(327:0.00033211,(254:0.00006654,((((614:0.00057162,439:0.00000000)0.5960:0.00028704,474:0.00028477)0.2340:0.00000097,241:0.00000000)0.3220:0.00011830,(634:0.00021691,(458:0.00009205,(283:0.00010285,(560:0.00028692,259:0.00000000)0.5160:0.00018284)0.5160:0.00019367)0.6740:0.00049765)0.2980:0.00009616)0.0700:0.00004051)0.1760:0.00023947)0.0980:0.00011981)0.0180:0.00007192)0.1440:0.00044208)0.0000:0.00008686)0.0560:0.00020684,((((((610:0.00023226,440:0.00033916)0.2620:0.00015073,262:0.00042109)0.0540:0.00004908,534:0.00009362)0.2280:0.00017601,273:0.00025278)0.1440:0.00015085,434:0.00013494)0.0960:0.00023696,((((((((628:0.00028768,39:0.00000000)0.7940:0.00000972,121:0.00027601)0.5320:0.00028322,159:0.00000247)0.1920:0.00016750,(215:0.00125137,(37:0.00026082,375:0.00002490)0.5040:0.00046568)0.1180:0.00026142)0.0060:0.00004270,(86:0.00053990,((88:0.00057284,87:0.00000000)0.1720:0.00000329,(547:0.00028093,93:0.00000480)0.5600:0.00028267)0.1680:0.00017511)0.1520:0.00022595)0.0060:0.00021461,(509:0.00096079,650:0.00018257)0.3440:0.00043857)0.0040:0.00007897,38:0.00024216)0.0180:0.00013084,(((492:0.00067795,405:0.00075208)0.4860:0.00020335,127:0.00036829)0.2140:0.00007315,(((((30:0.00028634,332:0.00000000)0.5740:0.00000128,556:0.00028441)0.3980:0.00036095,(603:0.00026341,142:0.00030801)0.3200:0.00013937)0.1700:0.00022710,658:0.00038055)0.0700:0.00009982,((((109:0.00028709,238:0.00000000)0.6520:0.00028565,266:0.00028604)0.3920:0.00000184,401:0.00000000)0.7840:0.00033176,(((559:0.00057428,158:0.00000000)0.5700:0.00028663,592:0.00000000)0.3160:0.00006820,(170:0.00033436,(261:0.00028349,(437:0.00028729,438:0.00000000)0.8560:0.00057416)0.3220:0.00023760)0.2340:0.00028957)0.0440:0.00006135)0.1420:0.00016837)0.0820:0.00024012)0.0780:0.00039545)0.0020:0.00019643)0.0180:0.00028417)0.0160:0.00045399)0.0060:0.00017875)0.0220:0.00062460)0.0100:0.00050335)0.1080:0.00032894)0.2100:0.00071732)0.0680:0.00024892)0.2720:0.00071897,(495:0.00434757,(521:0.00304559,(595:0.00470746,(486:0.00200599,487:0.00344407)1.0000:0.02385164)0.4420:0.00130459)0.4520:0.00119828)0.4220:0.00044447)0.9020:0.00320145,496:0.00475809)0.9840:0.00660067,(602:0.01256582,((((((637:0.00058362,200:0.00000000)0.7640:0.00043824,368:0.00013362)0.3340:0.00013313,(613:0.00071953,600:0.00071091)0.4480:0.00015302)0.7800:0.00073833,(311:0.00110652,(337:0.00000000,338:0.00029473)1.0000:0.00175793)0.2960:0.00008633)0.5960:0.00066045,620:0.00562004)1.0000:0.01253579,(361:0.01556253,((((449:0.00087375,448:0.00026977)0.4940:0.00014315,447:0.00071525)0.8280:0.00078610,359:0.00322666)1.0000:0.00871668,(510:0.00314732,((459:0.00088807,649:0.00054176)0.8800:0.00210382,(314:0.00051691,(((((290:0.00070153,335:0.00015579)0.7040:0.00051933,(641:0.00029575,297:0.00000000)0.3280:0.00005321)0.3200:0.00027041,360:0.00001537)0.1720:0.00009023,(177:0.00007938,(279:0.00040891,303:0.00016251)0.3040:0.00020640)0.2540:0.00032088)0.2960:0.00051285,((((473:0.00029445,181:0.00000000)0.1680:0.00010634,178:0.00161019)0.0700:0.00014944,(548:0.00034462,(179:0.00071772,508:0.00042580)0.3480:0.00022730)0.0520:0.00020865)0.0100:0.00005121,((((202:0.00027798,442:0.00000766)0.3860:0.00027933,485:0.00057829)0.0820:0.00004510,206:0.00024054)0.0880:0.00018521,(643:0.00055546,(180:0.00087200,(407:0.00029763,644:0.00000000)0.8040:0.00055828)0.3680:0.00030315)0.2220:0.00049442)0.0060:0.00009704)0.0420:0.00021035)0.1320:0.00029175)0.2440:0.00037712)1.0000:0.00589780)0.9940:0.00603749)0.9280:0.00268115)1.0000:0.01054645)0.8400:0.00502899)0.5100:0.00379208,(527:0.00504638,((((((204:0.00115298,402:0.00056357)0.8380:0.00114255,627:0.00201260)0.5700:0.00053758,(331:0.00076604,572:0.00066329)0.9040:0.00140005)1.0000:0.00420546,416:0.00493958)0.9820:0.00293738,632:0.00658143)0.9300:0.00284521,((((347:0.00028061,526:0.00029081)0.5500:0.00028309,536:0.00057442)0.6500:0.00049246,491:0.00136721)1.0000:0.00950694,(340:0.00016317,(((339:0.00014163,343:0.00014403)0.5320:0.00022757,336:0.00034412)0.4760:0.00028697,(((345:0.00056712,369:0.00029044)0.4940:0.00014590,346:0.00071198)0.9220:0.00095030,(342:0.00033638,(341:0.00014136,344:0.00014431)0.8020:0.00052134)0.3200:0.00005201)0.7020:0.00058996)0.5060:0.00011317)1.0000:0.00393593)0.8560:0.00251542)1.0000:0.02731305)0.8560:0.01252294);
