# Supplementary material for: Major genetic discontinuity and novel toxigenic species in Clostridioides difficile taxonomy
Source: eLife. 2021 Jun 11;10:e64325. doi: 10.7554/eLife.64325 (PMC8241443; doi:10.7554/eLife.64325)
Supplement: Supplementary file 3. [file elife-64325-supp3.tree]

#NEXUS
Begin taxa;
	Dimensions ntax=260;
	Taxlabels
		C-III_ST343_ERR2216003
		C-III_ST369_ERR2215981
		C-II_ST200_SRR3654506
		C-II_ST311_SRR3629287
		C-II_ST637_ERR3296451
		C-I_ST177_SRR3654510
		C-I_ST178_ERR232399
		C-I_ST179_ERR232400
		C-I_ST180_ERR232401
		C-I_ST181_ERR232402
		C-I_ST297_ERR2216002
		C-I_ST303_SRR8534877
		C-I_ST314_SRR3629659
		C-I_ST641_ERR789085
		C-I_ST643_SRR3242073
		C-I_ST644_SRR3242112
		C-I_ST649_SRR6009496
		C1_ST101_SRR6009085
		C1_ST102_SRR6009687
		C1_ST103_SRR6252275
		C1_ST104_SRR6009779
		C1_ST107_ERR340252
		C1_ST10_SRR6008993
		C1_ST110_SRR6291096
		C1_ST111_ERR340248
		C1_ST112_ERR340265
		C1_ST113_ERR340231
		C1_ST115_SRR3631786
		C1_ST122_ERR605020
		C1_ST125_SRR6009070
		C1_ST126_SRR3631393
		C1_ST129_SRR6009804
		C1_ST12_ERR347431
		C1_ST134_SRR6009142
		C1_ST139_ERR3284154
		C1_ST13_ERR1307019
		C1_ST14_SRR6009543
		C1_ST150_SRR3631533
		C1_ST152_ERR232392
		C1_ST153_ERR1544878
		C1_ST15_ERR1619748
		C1_ST160_SRR7309248
		C1_ST165_SRR3630383
		C1_ST16_ERR340188
		C1_ST172_SRR6009559
		C1_ST175_SRR3631134
		C1_ST17_SRR7308970
		C1_ST182_ERR2216000
		C1_ST18_ERR3284247
		C1_ST190_SRR8452266
		C1_ST19_SRR6009433
		C1_ST203_SRR6955987
		C1_ST205_ERR347550
		C1_ST20_SRR6009772
		C1_ST21_ERR256926
		C1_ST234_SRR6901875
		C1_ST236_SRR8452286
		C1_ST239_ERR347867
		C1_ST240_SRR3629428
		C1_ST244_SRR3629799
		C1_ST245_SRR3356348
		C1_ST248_ERR340126
		C1_ST24_ERR2215983
		C1_ST250_ERR347501
		C1_ST251_ERR3284172
		C1_ST255_ERR347892
		C1_ST26_SRR6009494
		C1_ST270_SRR3631371
		C1_ST271_ERR272107
		C1_ST27_SRR3631782
		C1_ST281_SRR3631209
		C1_ST282_SRR3631513
		C1_ST284_SRR3629575
		C1_ST289_ERR1024380
		C1_ST28_SRR6955955
		C1_ST295_ERR605031
		C1_ST296_SRR7073568
		C1_ST29_SRR6009479
		C1_ST2_ERR3284197
		C1_ST305_SRR3631793
		C1_ST306_SRR3631360
		C1_ST307_SRR3629381
		C1_ST308_SRR3629333
		C1_ST309_SRR3629293
		C1_ST312_SRR3629418
		C1_ST31_SRR6009240
		C1_ST322_SRR6009790
		C1_ST323_ERR3284122
		C1_ST324_SRR6009674
		C1_ST325_SRR6009557
		C1_ST328_SRR3629707
		C1_ST329_SRR3629299
		C1_ST33_SRR4300565
		C1_ST35_SRR6009651
		C1_ST363_SRR7297098
		C1_ST367_SRR6009777
		C1_ST36_ERR339612
		C1_ST370_SRR6109126
		C1_ST374_ERR425872
		C1_ST397_SRR8472999
		C1_ST3_SRR1801764
		C1_ST40_SRR3631790
		C1_ST427_SRR7297293
		C1_ST42_ERR3289205
		C1_ST436_ERR498034
		C1_ST43_SRR6901873
		C1_ST44_ERR272246
		C1_ST45_SRR6009023
		C1_ST46_SRR6009524
		C1_ST480_SRR7297555
		C1_ST48_SRR3629774
		C1_ST494_SRR7308815
		C1_ST49_SRR6914990
		C1_ST505_SRR6009568
		C1_ST50_ERR251737
		C1_ST512_ERR171345
		C1_ST51_ERR340192
		C1_ST52_ERR340089
		C1_ST53_ERR3284259
		C1_ST54_SRR7108974
		C1_ST55_SRR4300544
		C1_ST56_SRR6009266
		C1_ST57_SRR6009247
		C1_ST58_SRR6009468
		C1_ST59_ERR125977
		C1_ST60_ERR232386
		C1_ST636_ERR125919
		C1_ST639_ERR789063
		C1_ST63_SRR593247
		C1_ST640_ERR789074
		C1_ST645_SRR3631139
		C1_ST646_SRR4156268
		C1_ST647_SRR6009189
		C1_ST648_SRR6009391
		C1_ST653_SRR6915001
		C1_ST654_SRR7108978
		C1_ST655_SRR7309087
		C1_ST656_SRR7852193
		C1_ST659_SRR8447894
		C1_ST65_ERR339970
		C1_ST66_ERR347940
		C1_ST66_SRR6009797
		C1_ST68_ERR340027
		C1_ST69_SRR3631958
		C1_ST6_SRR6009061
		C1_ST6_SRR7852208
		C1_ST70_ERR340092
		C1_ST71_ERR340091
		C1_ST72_ERR339958
		C1_ST73_ERR340002
		C1_ST74_ERR340082
		C1_ST75_SRR6009325
		C1_ST76_ERR251783
		C1_ST78_ERR340026
		C1_ST7_SRR6009376
		C1_ST80_ERR340158
		C1_ST82_SRR3357953
		C1_ST83_SRR3629466
		C1_ST89_SRR3654482
		C1_ST8_ERR1853149
		C1_ST90_ERR347425
		C1_ST91_SRR3654471
		C1_ST92_ERR340216
		C1_ST98_SRR3631747
		C1_ST99_ERR3284248
		C1_ST9_SRR6009226
		C2_ST114_ERR171365
		C2_ST116_SRR3631877
		C2_ST123_SRR3357511
		C2_ST130_SRR3629642
		C2_ST140_ERR348082
		C2_ST154_SRR8426747
		C2_ST188_SRR2915788
		C2_ST197_ERR111458
		C2_ST1_SRR3631351
		C2_ST223_ERR348046
		C2_ST224_ERR348108
		C2_ST226_ERR2215957
		C2_ST229_SRR6042377
		C2_ST230_SRR3631814
		C2_ST231_ERR2215977
		C2_ST264_ERR2978802
		C2_ST269_ERR347554
		C2_ST32_SRR3631325
		C2_ST353_ERR251797
		C2_ST365_SRR7297375
		C2_ST371_ERR031688
		C2_ST417_SRR7308632
		C2_ST41_SRR2915782
		C2_ST47_ERR029530
		C2_ST481_SRR7297112
		C2_ST61_ERR125996
		C2_ST62_ERR232387
		C2_ST633_ERR026854
		C2_ST638_ERR467600
		C2_ST642_SRR2047599
		C2_ST651_SRR6197649
		C2_ST652_SRR6885274
		C2_ST67_SRR2915710
		C2_ST95_SRR3631924
		C2_ST97_SRR4156264
		C3_ST162_ERR232393
		C3_ST201_SRR6009012
		C3_ST221_SRR6986097
		C3_ST22_SRR6008966
		C3_ST285_SRR3938313
		C3_ST5_SRR3630588
		C3_ST96_SRR3630175
		C4_ST109_ERR1015522
		C4_ST121_SRR3631341
		C4_ST127_SRR3631939
		C4_ST158_ERR171360
		C4_ST159_SRR3654524
		C4_ST170_ERR232397
		C4_ST238_ERR232390
		C4_ST23_SRR3629750
		C4_ST241_SRR7108956
		C4_ST243_SRR3629634
		C4_ST254_SRR3631124
		C4_ST259_SRR3631894
		C4_ST260_SRR3631313
		C4_ST261_SRR3629607
		C4_ST266_ERR347452
		C4_ST273_SRR6009838
		C4_ST283_SRR3629577
		C4_ST30_ERR272057
		C4_ST310_SRR3629735
		C4_ST327_SRR3629489
		C4_ST375_SRR3630104
		C4_ST37_SRR2915746
		C4_ST38_SRR3631460
		C4_ST39_ERR272064
		C4_ST401_SRR6914998
		C4_ST559_SRR7073589
		C4_ST634_ERR1015455
		C4_ST635_ERR1015526
		C4_ST650_SRR6042358
		C4_ST658_SRR8452226
		C4_ST81_SRR1735384
		C4_ST86_ERR178558
		C4_ST87_ERR125966
		C4_ST88_ERR3284237
		C5_ST11_SRR6009820
		C5_ST161_ERR257024
		C5_ST163_SRR3631235
		C5_ST164_SRR3630942
		C5_ST166_SRR3630078
		C5_ST167_SRR3631169
		C5_ST168_ERR232396
		C5_ST169_SRR3630556
		C5_ST173_SRR3630120
		C5_ST174_SRR3631588
		C5_ST207_ERR348047
		C5_ST258_SRR3631291
		C5_ST280_ERR1854840
		C5_ST316_SRR7108949
		C5_ST317_SRR5410554
		C5_ST386_ERR1854836
		C5_ST387_ERR1854835
		C5_ST392_ERR1854834
		;
End;
Begin trees;
	Translate
		1 C-III_ST343_ERR2216003,
		2 C-III_ST369_ERR2215981,
		3 C-II_ST200_SRR3654506,
		4 C-II_ST311_SRR3629287,
		5 C-II_ST637_ERR3296451,
		6 C-I_ST177_SRR3654510,
		7 C-I_ST178_ERR232399,
		8 C-I_ST179_ERR232400,
		9 C-I_ST180_ERR232401,
		10 C-I_ST181_ERR232402,
		11 C-I_ST297_ERR2216002,
		12 C-I_ST303_SRR8534877,
		13 C-I_ST314_SRR3629659,
		14 C-I_ST641_ERR789085,
		15 C-I_ST643_SRR3242073,
		16 C-I_ST644_SRR3242112,
		17 C-I_ST649_SRR6009496,
		18 C1_ST101_SRR6009085,
		19 C1_ST102_SRR6009687,
		20 C1_ST103_SRR6252275,
		21 C1_ST104_SRR6009779,
		22 C1_ST107_ERR340252,
		23 C1_ST10_SRR6008993,
		24 C1_ST110_SRR6291096,
		25 C1_ST111_ERR340248,
		26 C1_ST112_ERR340265,
		27 C1_ST113_ERR340231,
		28 C1_ST115_SRR3631786,
		29 C1_ST122_ERR605020,
		30 C1_ST125_SRR6009070,
		31 C1_ST126_SRR3631393,
		32 C1_ST129_SRR6009804,
		33 C1_ST12_ERR347431,
		34 C1_ST134_SRR6009142,
		35 C1_ST139_ERR3284154,
		36 C1_ST13_ERR1307019,
		37 C1_ST14_SRR6009543,
		38 C1_ST150_SRR3631533,
		39 C1_ST152_ERR232392,
		40 C1_ST153_ERR1544878,
		41 C1_ST15_ERR1619748,
		42 C1_ST160_SRR7309248,
		43 C1_ST165_SRR3630383,
		44 C1_ST16_ERR340188,
		45 C1_ST172_SRR6009559,
		46 C1_ST175_SRR3631134,
		47 C1_ST17_SRR7308970,
		48 C1_ST182_ERR2216000,
		49 C1_ST18_ERR3284247,
		50 C1_ST190_SRR8452266,
		51 C1_ST19_SRR6009433,
		52 C1_ST203_SRR6955987,
		53 C1_ST205_ERR347550,
		54 C1_ST20_SRR6009772,
		55 C1_ST21_ERR256926,
		56 C1_ST234_SRR6901875,
		57 C1_ST236_SRR8452286,
		58 C1_ST239_ERR347867,
		59 C1_ST240_SRR3629428,
		60 C1_ST244_SRR3629799,
		61 C1_ST245_SRR3356348,
		62 C1_ST248_ERR340126,
		63 C1_ST24_ERR2215983,
		64 C1_ST250_ERR347501,
		65 C1_ST251_ERR3284172,
		66 C1_ST255_ERR347892,
		67 C1_ST26_SRR6009494,
		68 C1_ST270_SRR3631371,
		69 C1_ST271_ERR272107,
		70 C1_ST27_SRR3631782,
		71 C1_ST281_SRR3631209,
		72 C1_ST282_SRR3631513,
		73 C1_ST284_SRR3629575,
		74 C1_ST289_ERR1024380,
		75 C1_ST28_SRR6955955,
		76 C1_ST295_ERR605031,
		77 C1_ST296_SRR7073568,
		78 C1_ST29_SRR6009479,
		79 C1_ST2_ERR3284197,
		80 C1_ST305_SRR3631793,
		81 C1_ST306_SRR3631360,
		82 C1_ST307_SRR3629381,
		83 C1_ST308_SRR3629333,
		84 C1_ST309_SRR3629293,
		85 C1_ST312_SRR3629418,
		86 C1_ST31_SRR6009240,
		87 C1_ST322_SRR6009790,
		88 C1_ST323_ERR3284122,
		89 C1_ST324_SRR6009674,
		90 C1_ST325_SRR6009557,
		91 C1_ST328_SRR3629707,
		92 C1_ST329_SRR3629299,
		93 C1_ST33_SRR4300565,
		94 C1_ST35_SRR6009651,
		95 C1_ST363_SRR7297098,
		96 C1_ST367_SRR6009777,
		97 C1_ST36_ERR339612,
		98 C1_ST370_SRR6109126,
		99 C1_ST374_ERR425872,
		100 C1_ST397_SRR8472999,
		101 C1_ST3_SRR1801764,
		102 C1_ST40_SRR3631790,
		103 C1_ST427_SRR7297293,
		104 C1_ST42_ERR3289205,
		105 C1_ST436_ERR498034,
		106 C1_ST43_SRR6901873,
		107 C1_ST44_ERR272246,
		108 C1_ST45_SRR6009023,
		109 C1_ST46_SRR6009524,
		110 C1_ST480_SRR7297555,
		111 C1_ST48_SRR3629774,
		112 C1_ST494_SRR7308815,
		113 C1_ST49_SRR6914990,
		114 C1_ST505_SRR6009568,
		115 C1_ST50_ERR251737,
		116 C1_ST512_ERR171345,
		117 C1_ST51_ERR340192,
		118 C1_ST52_ERR340089,
		119 C1_ST53_ERR3284259,
		120 C1_ST54_SRR7108974,
		121 C1_ST55_SRR4300544,
		122 C1_ST56_SRR6009266,
		123 C1_ST57_SRR6009247,
		124 C1_ST58_SRR6009468,
		125 C1_ST59_ERR125977,
		126 C1_ST60_ERR232386,
		127 C1_ST636_ERR125919,
		128 C1_ST639_ERR789063,
		129 C1_ST63_SRR593247,
		130 C1_ST640_ERR789074,
		131 C1_ST645_SRR3631139,
		132 C1_ST646_SRR4156268,
		133 C1_ST647_SRR6009189,
		134 C1_ST648_SRR6009391,
		135 C1_ST653_SRR6915001,
		136 C1_ST654_SRR7108978,
		137 C1_ST655_SRR7309087,
		138 C1_ST656_SRR7852193,
		139 C1_ST659_SRR8447894,
		140 C1_ST65_ERR339970,
		141 C1_ST66_ERR347940,
		142 C1_ST66_SRR6009797,
		143 C1_ST68_ERR340027,
		144 C1_ST69_SRR3631958,
		145 C1_ST6_SRR6009061,
		146 C1_ST6_SRR7852208,
		147 C1_ST70_ERR340092,
		148 C1_ST71_ERR340091,
		149 C1_ST72_ERR339958,
		150 C1_ST73_ERR340002,
		151 C1_ST74_ERR340082,
		152 C1_ST75_SRR6009325,
		153 C1_ST76_ERR251783,
		154 C1_ST78_ERR340026,
		155 C1_ST7_SRR6009376,
		156 C1_ST80_ERR340158,
		157 C1_ST82_SRR3357953,
		158 C1_ST83_SRR3629466,
		159 C1_ST89_SRR3654482,
		160 C1_ST8_ERR1853149,
		161 C1_ST90_ERR347425,
		162 C1_ST91_SRR3654471,
		163 C1_ST92_ERR340216,
		164 C1_ST98_SRR3631747,
		165 C1_ST99_ERR3284248,
		166 C1_ST9_SRR6009226,
		167 C2_ST114_ERR171365,
		168 C2_ST116_SRR3631877,
		169 C2_ST123_SRR3357511,
		170 C2_ST130_SRR3629642,
		171 C2_ST140_ERR348082,
		172 C2_ST154_SRR8426747,
		173 C2_ST188_SRR2915788,
		174 C2_ST197_ERR111458,
		175 C2_ST1_SRR3631351,
		176 C2_ST223_ERR348046,
		177 C2_ST224_ERR348108,
		178 C2_ST226_ERR2215957,
		179 C2_ST229_SRR6042377,
		180 C2_ST230_SRR3631814,
		181 C2_ST231_ERR2215977,
		182 C2_ST264_ERR2978802,
		183 C2_ST269_ERR347554,
		184 C2_ST32_SRR3631325,
		185 C2_ST353_ERR251797,
		186 C2_ST365_SRR7297375,
		187 C2_ST371_ERR031688,
		188 C2_ST417_SRR7308632,
		189 C2_ST41_SRR2915782,
		190 C2_ST47_ERR029530,
		191 C2_ST481_SRR7297112,
		192 C2_ST61_ERR125996,
		193 C2_ST62_ERR232387,
		194 C2_ST633_ERR026854,
		195 C2_ST638_ERR467600,
		196 C2_ST642_SRR2047599,
		197 C2_ST651_SRR6197649,
		198 C2_ST652_SRR6885274,
		199 C2_ST67_SRR2915710,
		200 C2_ST95_SRR3631924,
		201 C2_ST97_SRR4156264,
		202 C3_ST162_ERR232393,
		203 C3_ST201_SRR6009012,
		204 C3_ST221_SRR6986097,
		205 C3_ST22_SRR6008966,
		206 C3_ST285_SRR3938313,
		207 C3_ST5_SRR3630588,
		208 C3_ST96_SRR3630175,
		209 C4_ST109_ERR1015522,
		210 C4_ST121_SRR3631341,
		211 C4_ST127_SRR3631939,
		212 C4_ST158_ERR171360,
		213 C4_ST159_SRR3654524,
		214 C4_ST170_ERR232397,
		215 C4_ST238_ERR232390,
		216 C4_ST23_SRR3629750,
		217 C4_ST241_SRR7108956,
		218 C4_ST243_SRR3629634,
		219 C4_ST254_SRR3631124,
		220 C4_ST259_SRR3631894,
		221 C4_ST260_SRR3631313,
		222 C4_ST261_SRR3629607,
		223 C4_ST266_ERR347452,
		224 C4_ST273_SRR6009838,
		225 C4_ST283_SRR3629577,
		226 C4_ST30_ERR272057,
		227 C4_ST310_SRR3629735,
		228 C4_ST327_SRR3629489,
		229 C4_ST375_SRR3630104,
		230 C4_ST37_SRR2915746,
		231 C4_ST38_SRR3631460,
		232 C4_ST39_ERR272064,
		233 C4_ST401_SRR6914998,
		234 C4_ST559_SRR7073589,
		235 C4_ST634_ERR1015455,
		236 C4_ST635_ERR1015526,
		237 C4_ST650_SRR6042358,
		238 C4_ST658_SRR8452226,
		239 C4_ST81_SRR1735384,
		240 C4_ST86_ERR178558,
		241 C4_ST87_ERR125966,
		242 C4_ST88_ERR3284237,
		243 C5_ST11_SRR6009820,
		244 C5_ST161_ERR257024,
		245 C5_ST163_SRR3631235,
		246 C5_ST164_SRR3630942,
		247 C5_ST166_SRR3630078,
		248 C5_ST167_SRR3631169,
		249 C5_ST168_ERR232396,
		250 C5_ST169_SRR3630556,
		251 C5_ST173_SRR3630120,
		252 C5_ST174_SRR3631588,
		253 C5_ST207_ERR348047,
		254 C5_ST258_SRR3631291,
		255 C5_ST280_ERR1854840,
		256 C5_ST316_SRR7108949,
		257 C5_ST317_SRR5410554,
		258 C5_ST386_ERR1854836,
		259 C5_ST387_ERR1854835,
		260 C5_ST392_ERR1854834
		;
tree TREE1 = [&R] ((1[&length_range={1141580.6044107438,9502384.713947626},height_95%_HPD={0.0,1.1920928955078125E-7},rate_95%_HPD={3.1839015209631355E-9,1.4977684565667987E-8},length_95%_HPD={1260606.004236275,6486519.988085953},rate=8.87981567441783E-9,length=2892131.302165316,rate_median=8.928007609798637E-9,length_median=2319915.452987195,height_median=4.470348358154297E-8,rate_range={2.50047…
End;
