# Supplementary material for: Major genetic discontinuity and novel toxigenic species in Clostridioides difficile taxonomy
Source: eLife. 2021 Jun 11;10:e64325. doi: 10.7554/eLife.64325 (PMC8241443; doi:10.7554/eLife.64325)
Supplement: Supplementary file 4. [file elife-64325-supp4.nex]

#NEXUS
[R-package treeio, Fri Jul 10 10:53:27 2020]
BEGIN TAXA;
	DIMENSIONS NTAX = 260;
	TAXLABELS
		C-II_ST311_SRR3629287
		C-II_ST200_SRR3654506
		C-II_ST637_ERR3296451
		C5_ST258_SRR3631291
		C5_ST161_ERR257024
		C5_ST207_ERR348047
		C5_ST11_SRR6009820
		C5_ST317_SRR5410554
		C5_ST169_SRR3630556
		C5_ST387_ERR1854835
		C5_ST392_ERR1854834
		C5_ST316_SRR7108949
		C5_ST163_SRR3631235
		C5_ST173_SRR3630120
		C5_ST174_SRR3631588
		C5_ST167_SRR3631169
		C5_ST164_SRR3630942
		C5_ST166_SRR3630078
		C5_ST386_ERR1854836
		C5_ST280_ERR1854840
		C5_ST168_ERR232396
		C3_ST162_ERR232393
		C3_ST201_SRR6009012
		C3_ST285_SRR3938313
		C3_ST221_SRR6986097
		C3_ST22_SRR6008966
		C3_ST5_SRR3630588
		C3_ST96_SRR3630175
		C1_ST284_SRR3629575
		C1_ST639_ERR789063
		C1_ST40_SRR3631790
		C1_ST107_ERR340252
		C1_ST329_SRR3629299
		C1_ST436_ERR498034
		C1_ST125_SRR6009070
		C1_ST150_SRR3631533
		C1_ST248_ERR340126
		C1_ST58_SRR6009468
		C1_ST374_ERR425872
		C1_ST270_SRR3631371
		C1_ST323_ERR3284122
		C1_ST165_SRR3630383
		C1_ST245_SRR3356348
		C1_ST83_SRR3629466
		C1_ST56_SRR6009266
		C1_ST70_ERR340092
		C1_ST12_ERR347431
		C1_ST57_SRR6009247
		C1_ST512_ERR171345
		C1_ST55_SRR4300544
		C1_ST99_ERR3284248
		C1_ST307_SRR3629381
		C1_ST654_SRR7108978
		C1_ST31_SRR6009240
		C1_ST29_SRR6009479
		C1_ST240_SRR3629428
		C1_ST153_ERR1544878
		C1_ST74_ERR340082
		C1_ST80_ERR340158
		C1_ST152_ERR232392
		C1_ST648_SRR6009391
		C1_ST101_SRR6009085
		C1_ST205_ERR347550
		C1_ST122_ERR605020
		C1_ST104_SRR6009779
		C1_ST15_ERR1619748
		C1_ST296_SRR7073568
		C1_ST640_ERR789074
		C1_ST190_SRR8452266
		C1_ST427_SRR7297293
		C2_ST642_SRR2047599
		C2_ST116_SRR3631877
		C1_ST646_SRR4156268
		C1_ST175_SRR3631134
		C2_ST123_SRR3357511
		C2_ST652_SRR6885274
		C2_ST32_SRR3631325
		C2_ST61_ERR125996
		C2_ST95_SRR3631924
		C2_ST47_ERR029530
		C2_ST481_SRR7297112
		C2_ST97_SRR4156264
		C2_ST269_ERR347554
		C2_ST223_ERR348046
		C2_ST154_SRR8426747
		C2_ST224_ERR348108
		C2_ST62_ERR232387
		C2_ST353_ERR251797
		C2_ST371_ERR031688
		C2_ST1_SRR3631351
		C2_ST417_SRR7308632
		C2_ST633_ERR026854
		C2_ST197_ERR111458
		C2_ST140_ERR348082
		C2_ST130_SRR3629642
		C2_ST114_ERR171365
		C2_ST638_ERR467600
		C2_ST226_ERR2215957
		C2_ST264_ERR2978802
		C2_ST67_SRR2915710
		C2_ST365_SRR7297375
		C2_ST231_ERR2215977
		C2_ST188_SRR2915788
		C2_ST230_SRR3631814
		C2_ST41_SRR2915782
		C1_ST281_SRR3631209
		C2_ST229_SRR6042377
		C2_ST651_SRR6197649
		C1_ST75_SRR6009325
		C1_ST363_SRR7297098
		C1_ST250_ERR347501
		C1_ST27_SRR3631782
		C1_ST26_SRR6009494
		C1_ST659_SRR8447894
		C1_ST656_SRR7852193
		C1_ST244_SRR3629799
		C1_ST203_SRR6955987
		C1_ST236_SRR8452286
		C1_ST59_ERR125977
		C1_ST397_SRR8472999
		C1_ST636_ERR125919
		C1_ST480_SRR7297555
		C1_ST645_SRR3631139
		C1_ST653_SRR6915001
		C1_ST312_SRR3629418
		C1_ST126_SRR3631393
		C1_ST328_SRR3629707
		C1_ST308_SRR3629333
		C1_ST33_SRR4300565
		C1_ST112_ERR340265
		C1_ST66_SRR6009797
		C1_ST66_ERR347940
		C1_ST251_ERR3284172
		C1_ST92_ERR340216
		C1_ST36_ERR339612
		C1_ST325_SRR6009557
		C1_ST172_SRR6009559
		C1_ST65_ERR339970
		C1_ST282_SRR3631513
		C1_ST102_SRR6009687
		C1_ST13_ERR1307019
		C1_ST50_ERR251737
		C1_ST370_SRR6109126
		C1_ST494_SRR7308815
		C1_ST111_ERR340248
		C1_ST14_SRR6009543
		C1_ST49_SRR6914990
		C1_ST110_SRR6291096
		C1_ST68_ERR340027
		C1_ST295_ERR605031
		C1_ST655_SRR7309087
		C1_ST2_ERR3284197
		C1_ST289_ERR1024380
		C1_ST90_ERR347425
		C1_ST182_ERR2216000
		C1_ST72_ERR339958
		C1_ST113_ERR340231
		C1_ST89_SRR3654482
		C1_ST6_SRR7852208
		C1_ST6_SRR6009061
		C1_ST103_SRR6252275
		C1_ST647_SRR6009189
		C1_ST255_ERR347892
		C1_ST19_SRR6009433
		C1_ST24_ERR2215983
		C1_ST20_SRR6009772
		C1_ST35_SRR6009651
		C1_ST367_SRR6009777
		C1_ST505_SRR6009568
		C1_ST324_SRR6009674
		C1_ST309_SRR3629293
		C1_ST305_SRR3631793
		C1_ST8_ERR1853149
		C1_ST51_ERR340192
		C1_ST28_SRR6955955
		C1_ST42_ERR3289205
		C1_ST115_SRR3631786
		C1_ST322_SRR6009790
		C1_ST52_ERR340089
		C1_ST139_ERR3284154
		C1_ST21_ERR256926
		C1_ST82_SRR3357953
		C1_ST76_ERR251783
		C1_ST73_ERR340002
		C1_ST53_ERR3284259
		C1_ST7_SRR6009376
		C1_ST54_SRR7108974
		C1_ST63_SRR593247
		C1_ST43_SRR6901873
		C1_ST234_SRR6901875
		C1_ST239_ERR347867
		C1_ST129_SRR6009804
		C1_ST48_SRR3629774
		C1_ST60_ERR232386
		C1_ST134_SRR6009142
		C1_ST17_SRR7308970
		C1_ST98_SRR3631747
		C1_ST69_SRR3631958
		C1_ST3_SRR1801764
		C1_ST271_ERR272107
		C1_ST46_SRR6009524
		C1_ST78_ERR340026
		C1_ST45_SRR6009023
		C1_ST71_ERR340091
		C1_ST91_SRR3654471
		C1_ST9_SRR6009226
		C1_ST18_ERR3284247
		C1_ST16_ERR340188
		C1_ST44_ERR272246
		C1_ST306_SRR3631360
		C1_ST160_SRR7309248
		C1_ST10_SRR6008993
		C4_ST127_SRR3631939
		C4_ST634_ERR1015455
		C4_ST259_SRR3631894
		C4_ST283_SRR3629577
		C4_ST635_ERR1015526
		C4_ST254_SRR3631124
		C4_ST310_SRR3629735
		C4_ST241_SRR7108956
		C4_ST243_SRR3629634
		C4_ST327_SRR3629489
		C4_ST273_SRR6009838
		C4_ST260_SRR3631313
		C4_ST88_ERR3284237
		C4_ST121_SRR3631341
		C4_ST261_SRR3629607
		C4_ST170_ERR232397
		C4_ST86_ERR178558
		C4_ST81_SRR1735384
		C4_ST375_SRR3630104
		C4_ST37_SRR2915746
		C4_ST158_ERR171360
		C4_ST109_ERR1015522
		C4_ST238_ERR232390
		C4_ST266_ERR347452
		C4_ST39_ERR272064
		C4_ST159_SRR3654524
		C4_ST401_SRR6914998
		C4_ST658_SRR8452226
		C4_ST559_SRR7073589
		C4_ST87_ERR125966
		C4_ST38_SRR3631460
		C4_ST30_ERR272057
		C4_ST23_SRR3629750
		C4_ST650_SRR6042358
		C-III_ST369_ERR2215981
		C-III_ST343_ERR2216003
		C-I_ST178_ERR232399
		C-I_ST179_ERR232400
		C-I_ST649_SRR6009496
		C-I_ST181_ERR232402
		C-I_ST314_SRR3629659
		C-I_ST297_ERR2216002
		C-I_ST641_ERR789085
		C-I_ST180_ERR232401
		C-I_ST643_SRR3242073
		C-I_ST644_SRR3242112
		C-I_ST177_SRR3654510
		C-I_ST303_SRR8534877
	;
END;
BEGIN TREES;
	TRANSLATE
		1	C-II_ST311_SRR3629287,
		2	C-II_ST200_SRR3654506,
		3	C-II_ST637_ERR3296451,
		4	C5_ST258_SRR3631291,
		5	C5_ST161_ERR257024,
		6	C5_ST207_ERR348047,
		7	C5_ST11_SRR6009820,
		8	C5_ST317_SRR5410554,
		9	C5_ST169_SRR3630556,
		10	C5_ST387_ERR1854835,
		11	C5_ST392_ERR1854834,
		12	C5_ST316_SRR7108949,
		13	C5_ST163_SRR3631235,
		14	C5_ST173_SRR3630120,
		15	C5_ST174_SRR3631588,
		16	C5_ST167_SRR3631169,
		17	C5_ST164_SRR3630942,
		18	C5_ST166_SRR3630078,
		19	C5_ST386_ERR1854836,
		20	C5_ST280_ERR1854840,
		21	C5_ST168_ERR232396,
		22	C3_ST162_ERR232393,
		23	C3_ST201_SRR6009012,
		24	C3_ST285_SRR3938313,
		25	C3_ST221_SRR6986097,
		26	C3_ST22_SRR6008966,
		27	C3_ST5_SRR3630588,
		28	C3_ST96_SRR3630175,
		29	C1_ST284_SRR3629575,
		30	C1_ST639_ERR789063,
		31	C1_ST40_SRR3631790,
		32	C1_ST107_ERR340252,
		33	C1_ST329_SRR3629299,
		34	C1_ST436_ERR498034,
		35	C1_ST125_SRR6009070,
		36	C1_ST150_SRR3631533,
		37	C1_ST248_ERR340126,
		38	C1_ST58_SRR6009468,
		39	C1_ST374_ERR425872,
		40	C1_ST270_SRR3631371,
		41	C1_ST323_ERR3284122,
		42	C1_ST165_SRR3630383,
		43	C1_ST245_SRR3356348,
		44	C1_ST83_SRR3629466,
		45	C1_ST56_SRR6009266,
		46	C1_ST70_ERR340092,
		47	C1_ST12_ERR347431,
		48	C1_ST57_SRR6009247,
		49	C1_ST512_ERR171345,
		50	C1_ST55_SRR4300544,
		51	C1_ST99_ERR3284248,
		52	C1_ST307_SRR3629381,
		53	C1_ST654_SRR7108978,
		54	C1_ST31_SRR6009240,
		55	C1_ST29_SRR6009479,
		56	C1_ST240_SRR3629428,
		57	C1_ST153_ERR1544878,
		58	C1_ST74_ERR340082,
		59	C1_ST80_ERR340158,
		60	C1_ST152_ERR232392,
		61	C1_ST648_SRR6009391,
		62	C1_ST101_SRR6009085,
		63	C1_ST205_ERR347550,
		64	C1_ST122_ERR605020,
		65	C1_ST104_SRR6009779,
		66	C1_ST15_ERR1619748,
		67	C1_ST296_SRR7073568,
		68	C1_ST640_ERR789074,
		69	C1_ST190_SRR8452266,
		70	C1_ST427_SRR7297293,
		71	C2_ST642_SRR2047599,
		72	C2_ST116_SRR3631877,
		73	C1_ST646_SRR4156268,
		74	C1_ST175_SRR3631134,
		75	C2_ST123_SRR3357511,
		76	C2_ST652_SRR6885274,
		77	C2_ST32_SRR3631325,
		78	C2_ST61_ERR125996,
		79	C2_ST95_SRR3631924,
		80	C2_ST47_ERR029530,
		81	C2_ST481_SRR7297112,
		82	C2_ST97_SRR4156264,
		83	C2_ST269_ERR347554,
		84	C2_ST223_ERR348046,
		85	C2_ST154_SRR8426747,
		86	C2_ST224_ERR348108,
		87	C2_ST62_ERR232387,
		88	C2_ST353_ERR251797,
		89	C2_ST371_ERR031688,
		90	C2_ST1_SRR3631351,
		91	C2_ST417_SRR7308632,
		92	C2_ST633_ERR026854,
		93	C2_ST197_ERR111458,
		94	C2_ST140_ERR348082,
		95	C2_ST130_SRR3629642,
		96	C2_ST114_ERR171365,
		97	C2_ST638_ERR467600,
		98	C2_ST226_ERR2215957,
		99	C2_ST264_ERR2978802,
		100	C2_ST67_SRR2915710,
		101	C2_ST365_SRR7297375,
		102	C2_ST231_ERR2215977,
		103	C2_ST188_SRR2915788,
		104	C2_ST230_SRR3631814,
		105	C2_ST41_SRR2915782,
		106	C1_ST281_SRR3631209,
		107	C2_ST229_SRR6042377,
		108	C2_ST651_SRR6197649,
		109	C1_ST75_SRR6009325,
		110	C1_ST363_SRR7297098,
		111	C1_ST250_ERR347501,
		112	C1_ST27_SRR3631782,
		113	C1_ST26_SRR6009494,
		114	C1_ST659_SRR8447894,
		115	C1_ST656_SRR7852193,
		116	C1_ST244_SRR3629799,
		117	C1_ST203_SRR6955987,
		118	C1_ST236_SRR8452286,
		119	C1_ST59_ERR125977,
		120	C1_ST397_SRR8472999,
		121	C1_ST636_ERR125919,
		122	C1_ST480_SRR7297555,
		123	C1_ST645_SRR3631139,
		124	C1_ST653_SRR6915001,
		125	C1_ST312_SRR3629418,
		126	C1_ST126_SRR3631393,
		127	C1_ST328_SRR3629707,
		128	C1_ST308_SRR3629333,
		129	C1_ST33_SRR4300565,
		130	C1_ST112_ERR340265,
		131	C1_ST66_SRR6009797,
		132	C1_ST66_ERR347940,
		133	C1_ST251_ERR3284172,
		134	C1_ST92_ERR340216,
		135	C1_ST36_ERR339612,
		136	C1_ST325_SRR6009557,
		137	C1_ST172_SRR6009559,
		138	C1_ST65_ERR339970,
		139	C1_ST282_SRR3631513,
		140	C1_ST102_SRR6009687,
		141	C1_ST13_ERR1307019,
		142	C1_ST50_ERR251737,
		143	C1_ST370_SRR6109126,
		144	C1_ST494_SRR7308815,
		145	C1_ST111_ERR340248,
		146	C1_ST14_SRR6009543,
		147	C1_ST49_SRR6914990,
		148	C1_ST110_SRR6291096,
		149	C1_ST68_ERR340027,
		150	C1_ST295_ERR605031,
		151	C1_ST655_SRR7309087,
		152	C1_ST2_ERR3284197,
		153	C1_ST289_ERR1024380,
		154	C1_ST90_ERR347425,
		155	C1_ST182_ERR2216000,
		156	C1_ST72_ERR339958,
		157	C1_ST113_ERR340231,
		158	C1_ST89_SRR3654482,
		159	C1_ST6_SRR7852208,
		160	C1_ST6_SRR6009061,
		161	C1_ST103_SRR6252275,
		162	C1_ST647_SRR6009189,
		163	C1_ST255_ERR347892,
		164	C1_ST19_SRR6009433,
		165	C1_ST24_ERR2215983,
		166	C1_ST20_SRR6009772,
		167	C1_ST35_SRR6009651,
		168	C1_ST367_SRR6009777,
		169	C1_ST505_SRR6009568,
		170	C1_ST324_SRR6009674,
		171	C1_ST309_SRR3629293,
		172	C1_ST305_SRR3631793,
		173	C1_ST8_ERR1853149,
		174	C1_ST51_ERR340192,
		175	C1_ST28_SRR6955955,
		176	C1_ST42_ERR3289205,
		177	C1_ST115_SRR3631786,
		178	C1_ST322_SRR6009790,
		179	C1_ST52_ERR340089,
		180	C1_ST139_ERR3284154,
		181	C1_ST21_ERR256926,
		182	C1_ST82_SRR3357953,
		183	C1_ST76_ERR251783,
		184	C1_ST73_ERR340002,
		185	C1_ST53_ERR3284259,
		186	C1_ST7_SRR6009376,
		187	C1_ST54_SRR7108974,
		188	C1_ST63_SRR593247,
		189	C1_ST43_SRR6901873,
		190	C1_ST234_SRR6901875,
		191	C1_ST239_ERR347867,
		192	C1_ST129_SRR6009804,
		193	C1_ST48_SRR3629774,
		194	C1_ST60_ERR232386,
		195	C1_ST134_SRR6009142,
		196	C1_ST17_SRR7308970,
		197	C1_ST98_SRR3631747,
		198	C1_ST69_SRR3631958,
		199	C1_ST3_SRR1801764,
		200	C1_ST271_ERR272107,
		201	C1_ST46_SRR6009524,
		202	C1_ST78_ERR340026,
		203	C1_ST45_SRR6009023,
		204	C1_ST71_ERR340091,
		205	C1_ST91_SRR3654471,
		206	C1_ST9_SRR6009226,
		207	C1_ST18_ERR3284247,
		208	C1_ST16_ERR340188,
		209	C1_ST44_ERR272246,
		210	C1_ST306_SRR3631360,
		211	C1_ST160_SRR7309248,
		212	C1_ST10_SRR6008993,
		213	C4_ST127_SRR3631939,
		214	C4_ST634_ERR1015455,
		215	C4_ST259_SRR3631894,
		216	C4_ST283_SRR3629577,
		217	C4_ST635_ERR1015526,
		218	C4_ST254_SRR3631124,
		219	C4_ST310_SRR3629735,
		220	C4_ST241_SRR7108956,
		221	C4_ST243_SRR3629634,
		222	C4_ST327_SRR3629489,
		223	C4_ST273_SRR6009838,
		224	C4_ST260_SRR3631313,
		225	C4_ST88_ERR3284237,
		226	C4_ST121_SRR3631341,
		227	C4_ST261_SRR3629607,
		228	C4_ST170_ERR232397,
		229	C4_ST86_ERR178558,
		230	C4_ST81_SRR1735384,
		231	C4_ST375_SRR3630104,
		232	C4_ST37_SRR2915746,
		233	C4_ST158_ERR171360,
		234	C4_ST109_ERR1015522,
		235	C4_ST238_ERR232390,
		236	C4_ST266_ERR347452,
		237	C4_ST39_ERR272064,
		238	C4_ST159_SRR3654524,
		239	C4_ST401_SRR6914998,
		240	C4_ST658_SRR8452226,
		241	C4_ST559_SRR7073589,
		242	C4_ST87_ERR125966,
		243	C4_ST38_SRR3631460,
		244	C4_ST30_ERR272057,
		245	C4_ST23_SRR3629750,
		246	C4_ST650_SRR6042358,
		247	C-III_ST369_ERR2215981,
		248	C-III_ST343_ERR2216003,
		249	C-I_ST178_ERR232399,
		250	C-I_ST179_ERR232400,
		251	C-I_ST649_SRR6009496,
		252	C-I_ST181_ERR232402,
		253	C-I_ST314_SRR3629659,
		254	C-I_ST297_ERR2216002,
		255	C-I_ST641_ERR789085,
		256	C-I_ST180_ERR232401,
		257	C-I_ST643_SRR3242073,
		258	C-I_ST644_SRR3242112,
		259	C-I_ST177_SRR3654510,
		260	C-I_ST303_SRR8534877
	;
	TREE * UNTITLED = [&R] ((247[&length_0.95_HPD={612912.015661114,612912.015661114},height_0.95_HPD={5.26582278311253,5.26582278311253}]:612912.0157,248[&length_0.95_HPD={612912.281483899,612912.281483899},height_0.95_HPD={5,5}]:612912.2815)[&length_0.95_HPD={46546437.22935,47437271.784127},height_0.95_HPD={1063612.6115268,172778.056749769}]:46997132.56,(((1[&length_0.95_HPD={697264.482482671,69726…
END;
